# Supplementary material for: Characteristics of Environmental Klebsiella pneumoniae and Klebsiella oxytoca Bacteriophages and Their Therapeutic Applications
Source: MDPI journal article supplement (doi:10.3390/pharmaceutics15020434), 2023-01-28
Supplement: s1 [file s1]

Table S1. Similarities of phage Kpn35c1 and Kpn6N terminase subunits to terminase subunits of selected model phages

| Phage   | Terminase subunit | Amino acid sequence motif           | E-value  | Model of the best matching amino acid sequence | Coverage/identity (%/%) | Model of similar structure (HHPred) | E-value |
|---------|-------------------|-------------------------------------|----------|------------------------------------------------|-------------------------|-------------------------------------|---------|
| Kpn35c1 | small             | pfam11053 (T4 small terminase sub.) | 6.87e-54 | T4                                             | 90/50                   | Aeromonas phage 44RR2.8t            | 9.7e-35 |
|         | large             | pfam03237 (T4 large terminase sub.) | 1.08e-42 | T4                                             | 97/68                   | T4                                  | 2.9e-58 |
| Kpn6N   | small             | pfam11053 (T4 small terminase sub.) | 1.38e-72 | T4                                             | 94/81                   | Aeromonas phage 44RR2.8t            | 2.7e-34 |
|         | large             | pfam03237 (T4 large terminase sub.) | 1.08e-42 | T4                                             | 99/83                   | T4                                  | 2.9e-58 |
