# Supplementary material for: Characteristics of Environmental Klebsiella pneumoniae and Klebsiella oxytoca Bacteriophages and Their Therapeutic Applications
Source: MDPI journal article supplement (doi:10.3390/pharmaceutics15020434), 2023-01-28
Supplement: s1 [file s1]

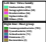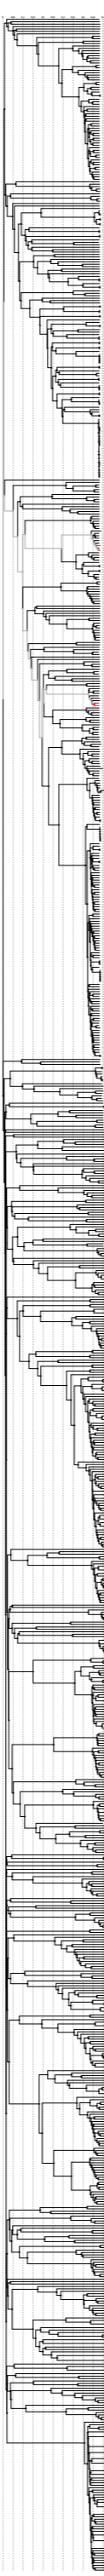

Species names listed vertically, corresponding to the tips of the phylogenetic tree. The list includes various genera and species, such as *Equisetum*, *Liliaceae*, *Ranunculaceae*, and others, arranged in a single column.

Ternstroemia

Straboviridae
