# Supplementary material for: Characteristics of Environmental Klebsiella pneumoniae and Klebsiella oxytoca Bacteriophages and Their Therapeutic Applications
Source: MDPI journal article supplement (doi:10.3390/pharmaceutics15020434), 2023-01-28
Supplement: s1 [file s1]

**Table S5.** Results of HHpred analysis of selected Kpn6N phage proteins. The best and most relevant hits are shown, including the coordinates of the matching regions, PDB ID and chain identifier, and the HHpred probability (%) in the matched regions. Results of HHpred analysis of T4 DenA and DenB proteins are shown for comparative purposes.

| Predicted gene product | Protein length (aa) | Matching residues (aa) | HHpred best match                                                                                                                                                                                                                                                    | PDB ID | Probability (%) |
|------------------------|---------------------|------------------------|----------------------------------------------------------------------------------------------------------------------------------------------------------------------------------------------------------------------------------------------------------------------|--------|-----------------|
| 6N_078                 | 378                 | 27-162                 | Protein O-linked-mannose beta-1,2-N-acetylglucosaminyltransferase 1; glycosyltransferase, O-mannosylation, alpha-dystroglycan, TRANSFERASE, SUGAR BINDING PROTEIN; 2.49A ( <i>Homo sapiens</i> )                                                                     | 5GGF_C | 99.07           |
|                        |                     | 27-180                 | Protein O-linked-mannose beta-1,2-N-acetylglucosaminyltransferase 1; glycosyltransferase, O-mannosylation, alpha-dystroglycan, SUGAR BINDING PROTEIN; HET: LEC; 1.211A ( <i>Homo sapiens</i> )                                                                       | 5GGN_B | 98.97           |
|                        |                     | 227-327                | ENDO-1,4-BETA-XYLANASE Y; CARBOHYDRATE-BINDING MODULE, XYLAN-BINDING, XYLANASE; HET: MSE; 2.1A ( <i>CLOSTRIDIUM THERMOCELLUM</i> ) SCOP: b.18.1.7                                                                                                                    | 1DYO_B | 95.63           |
|                        |                     | 227-326                | HYALURONATE LYASE; LYASE, HYALURONAN BINDING CARBOHYDRATE BINDING MODULE, CBM, PL FAMILY 8, PL8, HYL; HET: EDO; 1.2A ( <i>STREPTOCOCCUS PNEUMONIAE</i> TIGR4)                                                                                                        | 1D0Q_A | 94.87           |
|                        |                     | 227-327                | Endo-1,4-beta-xylanase C; Binding Site, Carbohydrates, Enzyme Stability, Substrate Specificity, Endo-1, 4-beta-xylanase, Xylan-binding domain, Thermophilic enzymes, Thermostabilizing Domains, Xylotetraose; HET: YYP; 1.67A ( <i>Paenibacillus barcinonensis</i> ) | 4XUR_B | 93.90           |
| 6N_079                 | 220                 | 28-74                  | Long-tail fiber proximal subunit; VIRAL PROTEIN, CAUDOVIRALES, MYOVIRIDAE; HET: GOL, PO4, MSE; 1.9A ( <i>Enterobacteria phage T4</i> )                                                                                                                               | 5NXF_A | 93.90           |
|                        |                     | 30-74                  | LARGE TAIL FIBER PROTEIN P34; VIRAL PROTEIN, CAUDOVIRALES, MYOVIRIDAE, TRIPLE BETA-HELIX; HET: MSE, GOL; 2.0A ( <i>ENTEROBACTERIA PHAGE T4</i> )                                                                                                                     | 4UXE_B | 92.61           |
|                        |                     | 104-163                | HYALURONIDASE-PHAGE ASSOCIATED; TRIPLE-STRANDED BETA-HELIX, HYALURONAN LYASE, PHAGE TAIL FIBRE, HYDROLASE, GLYCOSIDASE, HYALURONIDASE, SCARLET FEVER; 1.6A ( <i>STREPTOCOCCUS PYOGENES</i> )                                                                         | 2WH7_A | 69.21           |
|                        |                     | 104-163                | HYALURONIDASE-PHAGE ASSOCIATED; LYASE, HYALURONAN LYASE, PHAGE TAIL FIBRE, TRIPLE-STRANDED BETA- HELIX, HYALURONIDASE, SCARLET FEVER; 1.9A ( <i>STREPTOCOCCUS PYOGENES</i> )                                                                                         | 2WB3_A | 44.89           |
| 6N_080                 | 1535                | 1431-1530              | L-SHAPED TAIL FIBER PROTEIN; VIRAL PROTEIN, BACTERIAL VIRUSES, CAUDOVIRALES, SIPHOVIRIDAE, INFECTION; HET: FLC; 2.52A ( <i>ENTEROBACTERIA PHAGE T5</i> )                                                                                                             | 4UW8_H | 98.82           |
|                        |                     | 1431-1535              | Endo-N-acetylneuraminidase; Chaperone, Glycosidase, Hydrolase; HET: TAM, PEG; 2.6A ( <i>Enterobacteria phage K1F</i> )                                                                                                                                               | 3GW6_B | 98.77           |
|                        |                     | 1431-1533              | Long tail fiber distal subunit; Bacteriophage, Helical sandwich, Tail fiber, polyglycine, VIRAL PROTEIN; HET: MRD, MPD, IMD; 1.70355818561A ( <i>Salmonella phage vB_SenMS16</i> )                                                                                   | 6F45_B | 98.53           |
|                        |                     | 1387-1535              | Isoform 2 of Myelin regulatory factor; auto-catalytic protease, protein chaperone. trimeric protein, triple coiled-coil, membrane PROTEIN; HET: MSE; 2.4A ( <i>Mus musculus</i> )                                                                                    | 7DC3_A | 98.05           |
|                        |                     | 1431-1523              | Tail spike protein; bacteriophage, tailspike, <i>Acinetobacter baumannii</i> , gp42, VIRAL PROTEIN; HET: MSE; 1.794A ( <i>Acinetobacter phage vB_AbaP_AS12</i> )                                                                                                     | 6EU4_B | 97.75           |
| 6N_262                 | 1032                | 1-1032                 | Baseplate wedge protein gp7; T4, baseplate, complex, VIRAL PROTEIN; 3.8A ( <i>Enterobacteria phage T4</i> )                                                                                                                                                          | 5HX2_A | 100.00          |
|                        |                     | 179-448                | Glycosyl hydrolase, BNR repeat; 7-bladed beta-propeller fold, structural genomics, Joint Center for Structural Genomics, JCSG, Protein Structure Initiative, PSI-2, hydrolase; HET: MSE, EDO; 2.2A ( <i>Ralstonia eutropha</i> )                                     | 3B7F_A | 71.99           |
|                        |                     | 192-417                | EXO-1,5-ALPHA-L-ARABINOFURANOBIOSEDASE; HYDROLASE; HET: SO4; 1.6A ( <i>GIBBERELLA ZEAE</i> )                                                                                                                                                                         | 2YDT_A | 71.83           |
| 6N_057                 | 138                 | 1-135                  | ENDONUCLEASE II; GIY-YIG, NUCLEASE, HYDROLASE; HET: PEG, MSE; 1.9A ( <i>ENTEROBACTERIA PHAGE T4</i> )                                                                                                                                                                | 2WSH_A | 99.85           |
| 6N_101                 | 175                 | 36-147                 | Putative endonuclease; protein-DNA complex, restriction enzyme                                                                                                                                                                                                       | 2OST_A | 95.37           |

|                 |     |        |                                                                                                                                                                              |        |       |
|-----------------|-----|--------|------------------------------------------------------------------------------------------------------------------------------------------------------------------------------|--------|-------|
|                 |     |        | fold, PD-(D/E)-XK motif, homing endonuclease, group I intron, hydrolase-DNA COMPLEX; 3.1A {Synechocystis sp.}                                                                |        |       |
|                 |     | 40-91  | Holliday junction resolvase Hjc; HYDROLASE; 2.01A {Sulfolobus solfataricus} SCOP: c.52.1.18                                                                                  | 4TKD_D | 76.4  |
| <b>T4 DenB*</b> | 185 | 56-160 | Putative endonuclease; protein-DNA complex, restriction enzyme fold, PD-(D/E)-XK motif, homing endonuclease, group I intron, hydrolase-DNA COMPLEX; 3.1A {Synechocystis sp.} | 2OST_A | 95.64 |
|                 |     | 60-109 | Holliday junction resolvase Hjc; HYDROLASE; 2.01A {Sulfolobus solfataricus} SCOP: c.52.1.18                                                                                  | 4TKD_D | 74.98 |
| <b>6N_152</b>   | 398 | 1-398  | DNA alpha-glucosyltransferase; Transferase; HET: GOL, CME, UDP, EDO; 1.73A {Enterobacteria phage T4}                                                                         | 1XV5_A | 100   |
