# Supplementary material for: Characteristics of Environmental Klebsiella pneumoniae and Klebsiella oxytoca Bacteriophages and Their Therapeutic Applications
Source: MDPI journal article supplement (doi:10.3390/pharmaceutics15020434), 2023-01-28
Supplement: s1 [file s1]

## A

**Kpn5N:** 1 MAYTVSIAPLAASAVIGATTNFTATTSGAAAEGTEAFVWTVNGVKQSSVTAAMNYVAAGP 60  
MAY+VSIAPLAASAVIGATTNFTATTSGAAAEGTE FVWTVNGVKQSSVTAAMNYVAAGP

**Kpn6N:** 1 MAYSVSIAPLAASAVIGATTNFTATTSGAAAEGTETVWTVNGVKQSSVTAAMNYVAAGP 60

**Kpn5N:** 61 AGSKTVKVVATVTPAEGEAETAEAEETTLTVQNKTMPAITLTLSPSTSVSKEIGSQVVTAD 120  
AGSKTVKVVATVTPAEGEAETAEAEETTLTV+NKTMPAITLTLSPSTSVSKEIGSQVVTAD

**Kpn6N:** 61 AGSKTVKVVATVTPAEGEAETAEAEETTLTVKNKTMPAITLTLSPSTSVSKEIGSQVVTAD 120

**Kpn5N:** 121 VTGAPSGASIAVWVWKRGSVISGQTGKTITLTPAEANYTLNCEVTVSAADYNPATATKG 180  
VTGAPSGASIAVWVWKRGSVISGQTGKTITLTPAE +YTLNCEVTVSA DYN TATKG

**Kpn6N:** 121 VTGAPSGASIAVWVWKRGSVISGQTGKTITLTPESAETSYTLNCEVTVSAPDYNNGTATKG 180

**Kpn5N:** 181 VEVVFTKKTMSGVSVTLTPESITVEQGSDFKADVIGAPGASGTYSWTKDGSFVEGST 240  
+ V F KKTMSGVSVTL+P S++ E G A+V+GAPEGAS Y W + +EG T

**Kpn6N:** 181 IAVAFIKKTMSGVSVTLSPSTSVSKEIGSQVVTANVVGAPGASIAVWVWKRGTVVIEGQT 240

**Kpn5N:** 241 S-TLVIDTSDIGSQVIGVSVEVSAEDYNSVTVTGNTITKR 282 (of 373)  
+ T+ I S + + VSA DYN VTV+ +VTITK+

**Kpn6N:** 241 AKTITITESAEANYTLNCEATVSAPDYNPVTVSKGASVTITKK 283 (of 468)

## B

**Kpn5N:** 2 AYTVSIAPLAASAVIGATTNFTATTSGAAAEGTEAFVWTVNGVKQSSVTAAMNYVAAGPA 61  
A T++++P + S IG + TA +GA + + A+VW S T +

**Kpn6N:** 97 AITLTLSPSTSVSKEIGSQVVTADVTGAPSGASIAVWVWKRGSVISGQTGKTITLTESAE 156

**Kpn5N:** 62 GSKTVKVVATVTPAEGEAETAEAEETTLTVQNKTMPAITLTLSPSTSVSKEIGSQVVTADV 121  
S T+ TV+ + TA + KTM +++TLSPSTSVSKEIGSQVVTAV

**Kpn6N:** 157 TSYTLNCEVTVSAPDYNNGTATKGI AVAFIKKTMSGVSVTLSPSTSVSKEIGSQVVTANV 216

**Kpn5N:** 122 TGAPSGASIAVWVWKRGSVISGQTGKTITLTPAEANYTLNCEVTVSAADYNPATATKGV 181  
GAP GASIAVWVWKR+ VI GQT KTIT+TE AEANYTLNCE TVSA DYNP T +KG

**Kpn6N:** 217 VGAPEGASIAVWVWKRGTVVIEGQTAKTITITESAEANYTLNCEATVSAPDYNPVTVSKGA 276

**Kpn5N:** 182 EVVFTKKTMSGVSVTLTPESITVEQGSDFKADVIGAPGASGTYSWTKDGSFVEGSTS 241  
V TKKTMSGVSVTLTPESITVEQGSDFKADVIGAPGASGTYSWTKDGSFVEGSTS

**Kpn6N:** 277 SVTITKKTMSGVSVTLTPESITVEQGSDFKADVIGAPGATGVYSWTKDGSFVEGSTS 336

**Kpn5N:** 242 TLVIDTSDIGSQVIGVSVEVSAEDYNSVTVTGNTITKRVAAPDGELPYIHPLPFRG 301  
TLVIDTSDIGSQVIGVSVEVSA+DY VTVT TGNVTITKRVA PDGELPYIHPLPFRG

**Kpn6N:** 337 TLVIDTSDIGSQVIGVSVEVSADYTPVTVTGNTITKRVAPEPDGELPYIHPLPFRG 396

**Kpn5N:** 302 TAYIWCWWVMDEIQRMTVEGKDWKLDLDPDSYLLHRYTLAKMLDDYPEVDVQESRNGYI 361  
TAYIWCWWVMDEIQRMTVEGKDWKLDLDPDSYLLHRYTLAKMLDDYPEVDVQESRNGYI

**Kpn6N:** 397 TAYIWCWWVMDEIQRMTVEGKDWKLDLDPDSYLLHRYTLAKMLDDYPEVDVQESRNGYI 456

**Kpn5N:** 362 VHRTALEAGIIY 373 (of 373)  
VHRTALEAGIIY

**Kpn6N:** 457 VHRTALEAGIIY 468 (of 468)

**Figure S4:** Alignment of amino acid sequences of N-terminal (A) and C-terminal (B) regions of phage Kpn5N and Kpn6N gp17 proteins, counterparts of bacteriophage T4 Hoc.
