# Supplementary material for: Characteristics of Environmental Klebsiella pneumoniae and Klebsiella oxytoca Bacteriophages and Their Therapeutic Applications
Source: Pharmaceutics. 2023 Jan 28;15(2):434. doi: 10.3390/pharmaceutics15020434 (PMC9960720; doi:10.3390/pharmaceutics15020434)
Supplement: Supplementary file 1 [file pharmaceutics-15-00434-s001.zip › Supplementary_Table_S2.xlsx]

## Sheet: Predicted products of bacteriop
Gene product	Start	Stop	Protein length (aa)/tRNA length (nt)	Moll. Weight (kDa)	pKi	Predicted function	Top HHMER Hit/Sp/TMD	Description	Related T4 phage protein	T4 protein ID	Coverage/identity (%)
gp1	1	498	165	18.59	4.34	Phage terminase, small subunit	DNA_Packaging	Terminase DNA packaging enzyme	terminase small subunit	NP_049775.1	95/49
gp2	495	2315	606	69.59	5.43	terminase large subunit	Terminase_6N	Terminase large subunit, T4likevirus-type, N-terminal	terminase large subunit	NP_049776.1	97/64
gp3	2335	4326	663	72.01	4.71	tail sheath protein	Phage_sheath_1	Phage tail sheath protein subtilisin-like domain	tail sheath protein	AAA32541.1	99/61
gp4	4375	4860	161	18.22	4.58	tail tube protein	Phage_T4_gp19	T4-like virus tail tube protein gp19	tail tube protein gp19	NP_049781.1	99/63
gp5	4916	6490	524	60.72	4.98	Phage portal vertex of the head	Portal_Gp20	Bacteriophage T4-like portal protein (Gp20)	portal protein	NP_049782.1	98/54
gp6	6490	6732	80	9.20	4.18	prohead core protein	GP67	Gene product 67	prohead core protein	NP_049783.1	62/46*
gp7	6741	7145	134	15.12	10.91	prohead core protein			prohead core protein	NP_049784.1	85/48
gp8	7148	7795	215	23.61	4.87	Phage prohead assembly (scaffolding) protein	Peptidase_S77	Prohead core protein serine protease	prohead core scaffold protein and protease	NP_813810.1	99/60
gp9	7828	8616	262	29.28	4.14	hypothetical protein			prohead core protein	NP_049786.1	90/55
gp10	8636	10204	522	55.98	4.84	major capsid protein	Gp23	Major capsid protein Gp23	major capsid protein	NP_049787.1	100/72
gp11	10290	10925	211	24.1	10.03	homing endonuclease, homolog of SegD homing nuclease of Klebsiella phage K15	GIY-YIG	GIY-YIG catalytic domain	SecD homing endonuclease	NP_049788.2	97/42
gp12	10958	12247	429	47.20	4.81	capsid vertex protein	Gp23	Major capsid protein Gp23	capsid vertex protein	NP_049789.1	94/42
gp13	12552	12971	139	16.12	8.72	Single stranded DNA-binding protein, phage-associated	UvsY	Recombination, repair and ssDNA binding protein UvsY	recombination mediator protein UvsY	NP_049799.2	97/37
gp14	12971	13147	58	6.33	4.08	hypothetical protein	DUF2685	Protein of unknown function (DUF2685)	DUF2685 domain-containing protein	NP_049797.1	87/43
gp15	13682	13449	77	8.92	4.48	DNA helicase, phage-associated	UvsW-1	UvsW.1 domain	Helicase UvsW	NP_049796.1	93/57
gp16	15190	13691	479	57.73	9.57	DNA helicase, phage-associated	ResIII	Type III restriction enzyme, res subunit	Helicase UvsW	NP_049796.1	100/54
gp17	15261	15839	192	22.06	4.23	Inh inhibitor of gp21 prohead protease			Inh inhibitor of prohead protease gp21	NP_049794.1	98/36
gp18	15932	16243	103	12.12	5.16	hypothetical protein
gp19	16283	16852	189	21.60	6.13	hypothetical protein	HAD_SAK_2	HAD domain in Swiss Army Knife RNA repair proteins
gp20	16881	17942	353	37.76	4.00	VCBS precursor			Hoc head outer capsid protein (partial)	NP_049793.1	51/32*
gp21	17953	18228	91	10.77	4.15	Phage capsid and scaffold			Hoc head outer capsid protein (partial)	NP_049793.1	80/36
gp22	18242	18760	172	19.08	5.06	hypothetical protein
gp23	19257	18793	154	17.42	8.81	hypothetical protein
gp24	20146	19307	279	30.74	10.12	hypothetical protein
gp25	20261	21136	291	33.81	8.40	hypothetical protein
gp26	21169	21486	105	11.56	6.68	hypothetical protein
gp27	21483	21659	58	6.47	4.07	hypothetical protein	2xTMD
gp28	21656	21982	108	12.28	5.60	hypothetical protein
gp29	21984	22340	118	13.95	10.95	hypothetical protein
gp30	22340	22864	174	19.81	10.28	Srd postulated decoy of host sigma70 or sigmaS			Srd anti-sigma factor	NP_049634.1	42/30*
gp31	22868	23887	339	37.96	6.65	RNA ligase 2	RNA_ligase	RNA ligase	RNA ligase 2	NP_049790.1	99/45
gp32	23877	24458	193	21.67	6.91	hypothetical protein
gp33	24452	24970	172	20.04	6.35	hypothetical protein
gp34	25048	25308	86	9.65	4.02	hypothetical protein
gp35	25318	25767	149	17.06	8.61	hypothetical protein
gp36	25795	27228	477	53.36	6.96	putative nicotinate phosphoribosyltransferase	NAPRTase	Nicotinate phosphoribosyltransferase (NAPRTase) family
gp37	27215	27517	100	11.50	9.44	hypothetical protein
gp38	27514	28365	283	33.36	6.30	DNA adenine methylase (EC 2.1.1.72)	MethyltransfD12	D12 class N6 adenine-specific DNA methyltransferase	Dam DNA adenine methyltransferase	NP_049647.1	92/55
gp39	28374	28649	91	10.39	7.13	thioredoxin	Glutaredoxin	Glutaredoxin	NrdC thioredoxin	NP_049698.1	96/45
gp40	28681	29163	160	18.53	9.58	recombination endonuclease VII	Endonuclease_7	Recombination endonuclease VII	recombination endonuclease VII	NP_049692.1	96/53
gp41	29160	31283	707	80.29	7.00	anaerobic ribonucleoside-triphosphate reductase	NRDD	Anaerobic ribonucleoside-triphosphate reductase	NrdD anaerobic NTP reductase, large subunit	NP_049690.1	86/69
gp42	31351	31593	80	8.82	9.68	hypothetical protein
gp43	31590	32084	164	19.14	10.02	hypothetical protein
gp44	32084	32290	68	8.19	10.56	hypothetical protein
gp45	32311	32562	83	9.61	4.58	hypothetical protein
gp46	32623	32817	64	7.66	9.12	hypothetical protein
gp47	32814	33341	175	19.72	5.40	hypothetical protein
gp48	33338	33829	163	18.71	7.69	Ribonucleotide reductase of class III (anaerobic), activating protein (EC 1.97.1.4)	Fer4_12/LipoSP	4Fe-4S single cluster domain	NrdG anaerobic ribonucleoside-triphosphate reductase activating protein	NP_049688.1	91/60
gp49	33899	34864	321	35.42	9.51	hypothetical protein
gp50	34907	35575	222	25.70	4.56	hypothetical protein
gp51	35535	35816	93	10.85	6.46	glutaredoxin	Glutaredoxin	Glutaredoxin	NrdH glutaredoxin	NP_049686.1	95/41
gp52	35813	36112	99	11.79	10.00	hypothetical protein			gp55.2 hypothetical protein	NP_049681.1	92/35
gp53	36192	39965	1257	135.96	7.26	long tail fiber proximal subunit			long tail fiber proximal subunit	NP_049860.1	99/41
gp54	39965	41089	374	40.99	4.44	hinge connector of long tail fiber proximal connector			gp35 hinge connector of long tail fiber, proximal connector	NP_049861.1	99/30
gp55	41139	41807	222	23.27	9.15	hinge connector of long tail fiber distal connector	Phage_T4_gp36	Phage T4 tail fibre	gp36 hinge connector of long tail fiber, distal connector	NP_049862.1	100/57
gp56	41816	45802	1328	140.14	6.26	L-shaped tail fiber protein	Peptidase_S74	Chaperone of endosialidase	gp37 long tail fiber, distal subunit	NP_049863.1	13/42*
gp57	45839	46366	175	19.06	8.93	distal long tail fiber assembly catalyst	GP38	Phage tail fibre adhesin Gp38
gp58	46484	47131	215	24.74	8.37	holin	Phage_holin_T/TMD	Bacteriophage T holin	holin	NP_049865.1	88/50
gp59	47401	47132	89	10.31	10.34	hypothetical protein
gp60	47688	47398	96	11.31	4.36	hypothetical protein
gp61	48485	47688	265	30.52	5.96	hypothetical protein
gp62	48793	48566	75	8.89	9.55	hypothetical protein
gp63	49122	48790	110	12.54	4.30	hypothetical protein
gp64	49231	49097	44	5.34	11.20	hypothetical protein
gp65	49524	49276	82	9.27	6.23	hypothetical protein
gp66	49998	49561	145	17.02	10.15	nucleoid disruption protein
gp67	50347	49973	124	14.05	10.43	hypothetical protein	2xTMD
gp68	51292	50393	299	34.02	9.62	rIIB protein
gp69	53553	51292	753	87.04	8.71	hypothetical protein			rIIA protector from prophage-induced early lysis
gp70	53800	53636	54	6.28	8.49	hypothetical protein	TMD
gp71	54358	53804	184	21.25	10.09	hypothetical protein	SprT-like	SprT-like family
gp72	55716	54430	428	48.86	6.93	DNA topoisomerase, phage-associated	DNA_topoisoIV	DNA gyrase/topoisomerase IV, subunit A	DNA topisomerase II medium subunit	NP_049875.1	98/45
gp73	57614	55716	632	70.99	6.73	topoisomerase II large subunit	DNA_gyraseB	DNA gyrase B	DNA topoisomerase II, large subunit	QPI17232.1	73/50
gp74	57846	57682	54	6.14	8.86	hypothetical protein	Zn-ribbon_8	Zinc ribbon domain	gp39.2 hypothetical protein	NP_049623.1	74/43
gp75	58286	57846	146	17.63	4.69	hypothetical protein			MotB.2 hypothetical protein	NP_049628.1	60/30*
gp76	58893	58309	194	22.14	6.58	hypothetical protein
gp77	59158	58880	92	10.41	7.80	hypothetical protein
gp78	59751	59155	198	22.53	4.85	hypothetical protein	TMD
gp79	60120	59791	109	12.48	9.78	hypothetical protein
gp80	60410	60180	76	8.97	6.46	hypothetical protein
gp81	60741	60478	87	10.03	10.27	hypothetical protein
gp82	61132	60830	100	11.75	8.02	hypothetical protein	TMD
gp83	61353	61129	74	8.52	9.76	hypothetical protein
gp84	61506	61357	49	5.61	8.02	hypothetical protein	TMD
gp85	61851	61570	93	10.60	8.43	hypothetical protein	LysM	LysM domain
gp86	62519	61848	223	26.01	5.05	hypothetical protein	Rv2179c-like	3'-5' exoribonuclease Rv2179c-like domain
gp87	62800	62516	94	10.87	4.67	hypothetical protein
gp88	63109	62801	102	11.79	4.89	hypothetical protein
gp89	64462	63134	442	50.62	7.14	DNA helicase	AAA_30	AAA domain	Dda DNA helicase	NP_049632.1	99/44
gp90	64749	64459	96	11.32	9.64	hypothetical protein
gp91	64931	64746	61	6.94	5.59	hypothetical protein	2xTMD
gp92	65467	64931	178	20.63	4.59	dUTPase			dCTP pyrophosphatas	NP_049646.1	95/46
gp93	66500	65475	341	39.59	8.94	DNA primase subunit			DNA primase	NP_049648.1	98/51
gp94	66764	66504	86	9.56	6.43	hypothetical protein	zf-dskA_traR	Prokaryotic dksA/traR C4-type zinc finger
gp95	67038	66820	72	8.38	8.92	hypothetical protein
gp96	67523	67035	162	18.61	10.15	hypothetical protein	Gp23	Major capsid protein Gp23
gp97	68260	67529	243	27.38	4.69	hypothetical protein
gp98	68630	68241	129	14.61	3.71	hypothetical protein
gp99	68863	68627	78	8.53	10.1	hypothetical protein	2xTMD
gp100	69211	68957	84	9.52	4.18	hypothetical protein
gp101	69560	69291	89	10.13	10.52	hypothetical protein	2xTMD
gp102	71040	69604	478	53.63	5.81	DNA helicase	DnaB_C	DnaB-like helicase C terminal domain	41 helicase	NP_049654.1	96/60
gp103	71370	71050	106	12.37	5.17	Unclassified head protein	Phage_head_chap	Head assembly gene product	gp40 head vertex assembly chaperone	NP_049655.1	59/37*
gp104	72565	71408	385	43.15	4.61	recombination protein	RecA/TMD	recA bacterial DNA recombination protein	UvsX RecA-like recombination protein [Escherichia virus	NP_049656.2	87/57
gp105	75340	72641	899	104.15	6.21	DNA polymerase	DNA_pol_B	DNA polymerase family B	DNA polymerase	NP_049662.1	99/53
gp106	75716	75387	109	12.61	8.05	hypothetical protein
gp107	76000	75713	95	11.18	5.07	hypothetical protein
gp108	76431	76069	120	14.34	10.13	RegA translational repressor of early genes	Translat_reg	Bacteriophage translational regulator	translational repressor RegA	NP_049663.1	100/59
gp109	76998	76435	187	22.05	5.03	Phage DNA polymerase clamp loader subunit Gp62	Phage_clamp_A	Bacteriophage clamp loader A subunit	clamp loader small subunit	NP_049664.1	100/37
gp110	77999	77001	332	37.17	6.36	Replication factor C small subunit / Phage DNA polymerase clamp loader subunit	AAA	ATPase family associated with various cellular activities (AAA)	AAA family ATPase	NP_049665.1	94/47
gp111	78723	78058	221	24.50	4.64	Sliding clamp DNA polymerase accessory protein, phage associated	gp45-slide_C	gp45 sliding clamp, C terminal	sliding clamp	NP_049666.1	99/42
gp112	79019	78750	89	10.61	8.51	RNA polymerase binding protein	Phage_RpbA	Phage RNA polymerase binding, RpbA	RpbA RNA polymerase binding protein	NP_049667.1	42/36*
gp113	80046	79075	323	35.34	4.49	ssDNA binding protein	gp32	gp32 DNA binding protein like	single-stranded DNA binding protein gp32	NP_049854.1	77/54
gp114	80721	80062	219	26.13	9.76	Phage DNA helicase loader	T4_Gp59_N	T4 gene Gp59 loader of gp41 DNA helicase	gp59 loader of gp41 DNA helicase	NP_049856.1	89/48
gp115	80963	80718	81	8.94	4.19	hypothetical protein	Trans_coact	Phage late-transcription coactivator	gp33 late promoter transcription accessory protein	NP_049857.1	92/41
gp116	81230	80967	87	10.01	4.88	DsbA dsDNA binding	Phage_DsbA	Transcriptional regulator DsbA	DsbA dsDNA binding protein, late transcription	NP_049858.1	85/45
gp117	82175	81240	311	36.62	5.63	Phage ribonuclease H (EC 3.1.26.4)	RNaseH_C	T4 RNase H, C terminal	RNAse H	NP_049859.1	96/42
gp118	82480	83007	175	20.39	4.63	T4-like phage RNA polymerase sigma factor for late transcription			RNA polymerase sigma factor	NP_049679.1	93/47
gp119	83004	83219	71	8.21	3.62	hypothetical protein
gp120	83212	83538	108	12.86	9.77	hypothetical protein	DUF2654	Protein of unknown function (DUF2654)	a-gt.4 family protein	NP_049677.1	92/36
gp121	83575	84621	348	40.01	4.62	recombination endonuclease subunit	Metallophos	Calcineurin-like phosphoesterase	gp47 recombination endonuclease subunit	NP_049672.1	98/44
gp122	84608	84895	95	11.14	3.91	hypothetical protein
gp123	84879	86576	565	64.24	7.66	recombination endonuclease subunit	AAA_23	AAA domain	gp46 endonuclease subunit	NP_049669.1	98/44
gp124	86576	86767	63	7.75	4.64	hypothetical protein			gp45.2 conserved hypothetical protein	NP_049668.1	88/41
gp125	86841	88550	569	63.68	10.09	hypothetical protein
gp126	88610	88900	96	11.42	7.96	hypothetical protein
gp127	88897	89127	76	8.59	3.64	hypothetical protein
gp128	89124	89381	85	10.03	6.95	hypothetical protein
gp129	89378	89956	192	21.27	7.02	dihydrofolate reductase	DHFR_1	Dihydrofolate reductase	Frd dihydrofolate reductase	NP_049850.1	71/39
gp130	89958	90833	291	33.02	5.02	thymidylate synthase	Thymidylat_synt	Thymidylate synthase	dTMP (thymidylate) synthase	NP_049848.1	100/52
gp131	90873	93125	750	85.06	5.98	Ribonucleotide reductase of class Ia (aerobic), alpha subunit (EC 1.17.4.1)	Ribonuc_red_lgC	Ribonucleotide reductase, barrel domain	aerobic NDP reductase, large subunit	NP_049845.1	99/61
gp132	93162	94337	391	45.51	5.61	Ribonucleotide reductase of class Ia (aerobic), beta subunit (EC 1.17.4.1)	Ribonuc_red_sm	Ribonucleotide reductase, small chain	NrdB aerobic NDP reductase, small subunit	NP_049841.1	97/51
gp133	94300	94629	109	12.38	8.65	hypothetical protein	DUF4326	Domain of unknown function (DUF4326)	NrdA.1 conserved hypothetical protein	NP_049846.1	74/50
gp134	94633	94998	121	14.67	9.53	homing endonuclease			endonuclease II	NP_049840.1	92/31
gp135	94979	96136	385	44.16	4.80	RNA ligase	RNA_lig_T4_1	RNA ligase	RNA ligase 1 and tail fiber attachment catalyst	NP_049839.1	97/45
gp136	96145	96456	103	11.92	9.37	hypothetical protein	TMD		PseT.3 conserved hypothetical predicted membrane protein	NP_049837.1	36/34*
gp137	96453	96767	104	11.71	9.42	hypothetical protein	LipoSP		PseT.2 conserved hypothetical protein, outer membrane lipoprotein Rz1	NP_049836.2	89/32
gp138	96752	96925	57	7.03	5.05	hypothetical protein
gp139	96922	97806	294	33.75	6.72	polynucleotide kinase	AAA_33	AAA domain	AAA family ATPase	NP_049834.1	99/39
gp140	97859	98146	95	10.63	6.45	hypothetical protein			Cd.2 conserved hypothetical protein	NP_049830.1	38/32*
gp141	98143	98394	83	9.35	4.36	hypothetical protein
gp142	98387	98671	94	10.75	6.20	hypothetical protein
gp143	98661	99167	168	19.19	7.40	dCMP deaminase (EC 3.5.4.12)	dCMP_cyt_deam_1	Cytidine and deoxycytidylate deaminase zinc-binding region	deoxycytidylate deaminase	NP_049828.1	88/34
gp144	99183	99524	113	12.32	6.23	gp31 co-chaperonin for GroEL	Cpn10	Chaperonin 10 Kd subunit	co-chaperone GroES	NP_049825.1	100/38
gp145	99535	99786	83	9.42	7.99	hypothetical protein
tRNA1	99794	99870	NA	NA	NA	tRNA-Met-CAT
tRNA2	99876	99952	NA	NA	NA	tRNA-Gln-CTG
gp146	99971	100084	37	3.93	10.63	hypothetical protein
gp147	100101	100382	93	11.11	4.25	hypothetical protein
gp148	100392	100814	140	16.40	9.33	hypothetical protein
gp149	100856	101422	188	2.24	10.19	hypothetical protein	TMD
gp150	101433	101795	120	13.70	6.24	hypothetical protein	Gly_radical	Glycine radical	Vs.6 conserved hypothetical protein	NP_049730.1	100/76
gp151	101795	102064	89	10.30	4.42	hypothetical protein			Vs.4 conserved hypothetical protein	NP_049728.1	97/51
gp152	102190	102483	97	10.50	11.21	hypothetical protein
gp153	102486	102725	79	9.1	6.45	hypothetical protein
gp154	102710	102880	56	6.55	4.97	hypothetical protein
gp155	102877	103029	50	6.00	10.66	hypothetical protein
gp156	103113	103553	146	16.97	9.94	hypothetical protein	Phage_30_3	Bacteriophage protein GP30.3	hypothetical protein T4p205	NP_049816.1	100/42
gp157	103550	103813	87	9.64	5.75	hypothetical protein
gp158	103815	104036	73	8.73	4.09	hypothetical protein
gp159	104033	104647	204	23.33	5.30	hypothetical protein			hypothetical protein T4p204	NP_049815.1	97/48
gp160	104628	106157	509	58.20	4.82	DNA ligase, phage-associated	DNA_ligase_A_M	ATP dependent DNA ligase domain	DNA ligase	NP_049813.1	99/39
gp161	106234	106803	189	21.69	7.03	hypothetical protein
gp162	106892	107095	67	7.77	9.07	hypothetical protein
gp163	107098	107274	58	6.61	5.00	hypothetical protein
gp164	107271	107435	54	6.31	5.40	hypothetical protein	2xTMD
gp165	107516	107806	96	10.82	4.00	hypothetical protein
gp166	107817	108128	103	11.84	6.31	hypothetical protein
gp167	108115	108492	125	14.68	4.84	hypothetical protein
gp168	109598	108489	369	42.01	4.80	baseplate hub subunit	Phage-tail_1	Baseplate structural protein, domain 1	baseplate hub subunit	NP_049803.1	52/26*
gp169	109669	110244	191	22.17	6.24	baseplate distal hub subunit	Phage_hub_GP28	Baseplate hub distal subunit	gp28 baseplate hub distal subunit	NP_049804.2	34/36*
gp170	110241	112034	597	67.26	5.15	hypothetical protein			gp29 baseplate hub subunit, tail length determinator	NP_049805.1	27/27*
gp171	112045	113118	357	39.07	5.90	Phage baseplate tail tube cap (T4-like gp48)	T4_tail_cap	Tail-tube assembly protein	baseplate tail tube cap	NP_049806.1	94/30
gp172	113128	113991	287	32.04	4.53	Phage baseplate hub protein (T4-like gp54)	Phage_T4_gp19	T4-like virus tail tube protein gp19	baseplate subunit	NP_049807.1	91/35
gp173	114020	114763	247	28.53	4.68	hypothetical protein	T4_baseplate	T4 bacteriophage base plate protein	baseplate hub assembly protein	NP_049802.1	96/27
gp174	114760	115314	184	21.48	4.74	baseplate hub subunit	T4_baseplate	T4 bacteriophage base plate protein	gp26 baseplate hub subunit	NP_049801.1	41/29*
gp175	115315	115707	130	14.47	4.15	baseplate wedge subunit	GPW_gp25	Baseplate wedge protein gp25	Baseplate wedge protein gp25	NP_049800.1	97/59
gp176	116197	115742	151	17.67	4.72	hypothetical protein
gp177	116429	116205	74	8.38	4.99	hypothetical protein
gp178	116787	116431	118	13.55	4.81	hypothetical protein	SP
gp179	117071	116787	94	10.81	4.03	hypothetical protein
gp180	117557	117087	156	17.66	4.00	hypothetical protein
gp181	117712	117554	52	5.86	8.02	hypothetical protein	2xTMD
gp182	118359	117709	216	24.77	4.59	hypothetical protein
gp183	120612	118396	738	82.36	4.98	hypothetical protein	VWA_3	von Willebrand factor type A domain
gp184	120940	120620	106	12.27	4.37	hypothetical protein
gp185	121455	120940	171	20.15	4.41	hypothetical protein
gp186	121694	121455	79	9.37	5.48	hypothetical protein
gp187	121968	121681	95	11.04	4.24	hypothetical protein
gp188	122135	121968	55	6.19	6.04	hypothetical protein	2xTMD
	122346	122143				hypothetical protein with transmembrane segment
gp189	122667	122389	92	10.60	5.78	hypothetical protein
gp190	123637	122726	303	34.21	8.36	cytosine-specific methyltransferase	DNA_methylase	C-5 cytosine-specific DNA methylase
gp191	123894	123634	86	96.1	3.86	hypothetical protein
gp192	124139	123894	81	9.01	5.76	hypothetical protein
gp193	125143	124136	335	38.07	7.32	hypothetical protein	RlaP	RNA repair pathway DNA polymerase beta family	hypothetical protein T4p095	NP_049709.1	100/50
gp194	125520	125143	125	14.58	8.62	hypothetical protein
gp195	125744	125517	75	8.78	8.26	hypothetical protein
gp196	126322	125741	193	21.44	7.91	hypothetical protein
gp197	126594	126325	89	10.41	5.12	hypothetical protein
gp198	127721	126663	352	40.83	7.19	hypothetical protein	NUDIX	NUDIX domain
gp199	128812	127898	304	34.07	8.98	hypothetical protein	Band_7/TMD	SPFH domain / Band 7 family
gp200	129306	128884	140	15.97	6.33	hypothetical protein	DUF5856	Family of unknown function (DUF5856)	hypothetical protein T4p103	NP_049716.1	86/35
gp201	129559	129278	93	10.80	8.48	hypothetical protein	SP		rI lysis inhibition regulator, membrane protein	NP_049717.1	96/28
gp202	130057	129665	130	15.48	9.98	hypothetical protein
gp203	130682	130074	202	23.05	5.33	thymidine kinase (EC 2.7.1.21)	TK	Thymidine kinase	Tk thymidine kinase	NP_049719.1	95/53
gp204	130962	130675	95	10.66	9.21	hypothetical protein
gp205	131438	130965	157	17.04	7.69	hypothetical protein	Macro	Macro domain	macro domain-containing protein	NP_049723.1	97/32
gp206	131616	131428	62	7.47	4.23	hypothetical protein
gp207	131778	131662	38	4.41	9.92	hypothetical protein	TMD
gp208	131887	131771	38	4.25	4.06	[Klebsiella phage KP15.]	TMD/SP
gp209	132210	131887	107	12.27	7.67	hypothetical protein	SP		Vs.8 conserved hypothetical protein	NP_049732.1	45/34*
gp210	132810	132220	196	22.71	4.67	hypothetical protein
gp211	132953	132807	48	5.51	7.00	hypothetical protein	DUF5484	Family of unknown function (DUF5484)	gp55.4 conserved hypothetical protein	NP_049683.1	77/64
gp212	133359	132964	131	15.59	5.18	hypothetical protein
gp213	134069	133428	213	24.01	10.05	hypothetical protein	SLT/SP	Transglycosylase SLT domain	transglycosylase SLT domain-containing protein	NP_049725.1	69/34*
gp214	134688	134134	184	21.45	6.26	hypothetical protein
gp215	134898	134701	65	7.35	8.34	hypothetical protein
gp216	136277	134934	447	49.65	4.85	hypothetical protein	PhoH	PhoH-like protein
gp217	136791	136333	152	17.71	8.19	hypothetical protein
gp218	137218	136823	131	14.73	10.38	Phage endolysin	Peptidase_M15_4	D-alanyl-D-alanine carboxypeptidase
gp219	137687	137286	133	15.72	5.74	hypothetical protein
gp220	138065	137742	107	12.03	4.21	hypothetical protein
gp221	138368	138105	87	9.82	3.88	hypothetical protein
gp222	138698	138438	86	9.36	6.92	hypothetical protein	LipoSP		hypothetical protein T4583L_7	QZB89654.1	83/57
gp223	139131	138700	143	16.05	4.57	hypothetical protein
gp224	139395	139141	84	9.61	8.57	hypothetical protein
gp225	139582	139409	57	6.58	10.30	hypothetical protein
gp226	139926	139579	115	13.23	4.89	hypothetical protein
gp227	140251	139907	114	13.42	5.90	hypothetical protein
gp228	141402	140248	384	42.91	6.49	radical SAM superfamily protein	SPASM	Iron-sulfur cluster-binding domain
gp229	141415	142143	242	28.43	10.22	hypothetical protein			SegA homing endonuclease	NP_049657.1	46/26*
gp230	142390	142136	84	10.21	10.46	hypothetical protein
gp231	142536	142390	48	5.61	4.59	hypothetical protein
gp232	142784	142533	83	9.72	6.28	hypothetical protein
gp233	143134	142856	92	10.42	4.38	hypothetical protein	DUF5417	Family of unknown function (DUF5417)	DUF5417 domain-containing protein	NP_049851.1	100/48
gp234	143478	143218	86	10.21	9.69	hypothetical protein
gp235	144053	143478	191	22.30	6.64	hypothetical protein
gp236	144459	144061	132	15.04	7.04	hypothetical protein
gp237	144834	144634	66	7.57	7.81	hypothetical protein
gp238	145825	144911	304	35.32	6.96	hypothetical protein
gp239	146349	145822	175	20.56	6.11	hypothetical protein	DUF262	Protein of unknown function DUF262
gp240	146672	146349	107	12.05	5.62	hypothetical protein	TMD
gp241	146958	146701	85	9.64	5.05	hypothetical protein
gp242	147343	146960	127	14.79	4.37	hypothetical protein
gp243	147761	147354	135	15.14	5.22	NudE nudix hydrolase	NUDIX	NUDIX domain	NudE nudix hydrolase	NP_049737.1	84/42
gp244	148007	147762	81	9.34	5.56	hypothetical protein
gp245	148255	148004	83	9.32	5.64	hypothetical protein
gp246	148541	148248	97	11.21	3.87	hypothetical protein
gp247	148873	148538	111	12.61	8.86	hypothetical protein
gp248	149024	148884	46	5.1	10.04	hypothetical protein	TMD
gp249	149254	149114	46	5.25	8.27	hypothetical protein	SP
gp250	149858	149319	179	20.83	9.83	hypothetical protein
gp251	150489	149866	207	23.68	5.18	hypothetical protein			hypothetical protein T4p137	NP_049750.1	69/38*
gp252	150800	150564	78	8.34	4.12	hypothetical protein
gp253	151510	150815	231	26.89	7.74	deoxynucleoside monophosphate kinase			deoxynucleoside monophosphate kinase	NP_049752.1	97/32
gp254	152040	151510	176	19.88	4.25	tail completion and sheath stabilizer protein	Phage_T4_gp19	T4-like virus tail tube protein gp19	tail completion and sheath stabilizer protein	NP_049753.1	94/38
gp255	152409	153197	262	29.23	8.95	hypothetical protein
gp256	154088	153234	284	32.86	10.76	DNA end protector protein			DNA end protector protein	NP_049754.1	97/47
gp257	154571	154104	155	18.75	10.19	head completion protein	Tn7_TnsA-like_N	TnsA-like endonuclease N terminal	head completion protein	NP_049755.1	96/51
gp258	154622	155176	184	21.77	4.59	Phage baseplate wedge protein	Phage_gp53	Base plate wedge protein 53	Base plate wedge protein 53	NP_049756.1	98/54
gp259	155173	156942	589	64.30	4.82	Phage baseplate hub structural protein / Phage lysozyme R (EC 3.2.1.17)	Gp5_OB	Gp5 N-terminal OB domain	baseplate hub subunit and tail lysozyme	NP_049757.1	89/50
gp260	156947	159013	688	76.25	4.56	hypothetical protein
gp261	159045	160970	641	71.16	4.30	baseplate wedge subunit			baseplate wedge subunit	NP_049764.1	97/58
gp262	161051	164137	1028	118.77	4.81	baseplate wedge subunit			baseplate wedge subunit	NP_049765.1	99/51
gp263	164138	165130	330	37.58	4.54	baseplate wedge subunit	Phage-Gp8	Bacteriophage T4, Gp8	baseplate wedge subunit, gp8	NP_049766.1	98/59
gp264	165140	166003	287	31.08	4.82	baseplate wedge tail fiber connector	T4_gp9_10	Bacteriophage T4 gp9/10-like protein	baseplate wedge tail fiber connector, gp9	NP_049767.1	88/43
gp265	166000	167817	605	66.54	4.40	baseplate wedge subunit and tail pin	T4_gp9_10	Bacteriophage T4 gp9/10-like protein	baseplate wedge subunit and tail pin, gp10	NP_049768.1	100/49
gp266	167817	168485	222	24.39	4.55	baseplate wedge subunit and tail pin	GP11	GP11 baseplate wedge protein	baseplate wedge subunit and tail pin, gp11	NP_049769.1	94/27
gp267	168495	169880	461	49.80	7.46	tail fibers protein	Collar	Phage Tail Collar Domain	short tail fibers protein, gp12	NP_049770.1	99/37
gp268	169894	171645	583	62.92	4.21	hypothetical protein	Fibritin_C	Fibritin C-terminal region	fibritin neck whiskers protein	NP_049771.1	82/28
gp269	171684	172610	308	33.65	4.63	Phage neck protein			neck protein	NP_049772.1	98/53
gp270	172620	173366	248	28.97	4.06	Phage neck protein	T4_neck-protein	Virus neck protein	neck protein	NP_049773.1	100/51
gp271	173447	174268	274	31.97	5.75	tail sheath stabilizer and completion protein	T4-gp15_tss	T4-like virus Myoviridae tail sheath stabiliser	bacteriophage T4 tail terminator protein, gp15	NP_049774.1	90/53
