# Supplementary material for: Characteristics of Environmental Klebsiella pneumoniae and Klebsiella oxytoca Bacteriophages and Their Therapeutic Applications
Source: Pharmaceutics. 2023 Jan 28;15(2):434. doi: 10.3390/pharmaceutics15020434 (PMC9960720; doi:10.3390/pharmaceutics15020434)
Supplement: Supplementary file 1 [file pharmaceutics-15-00434-s001.zip › Supplementary_Table_S3.xlsx]

## Sheet: Predicted products of bacteriop
Gene product	Gene start	Gene stop	Protein length (aa)/ /tRNA length (nt)	Mol. Weight (kDa)	pKi	Predicted function	Top HHMER Hit/SP/TMD	Description	Related T4 phage protein	ID of similar T4 protein(s)	Coverage/Identity (%)
gp1	1	510	167	18.09	4.38	terminase small subunit	DNA_Packaging	Terminase DNA packaging enzyme	small terminase subunit	NP_049775.1	94/81
gp2	488	2326	612	69.82	5.23	terminase large subunit	Terminase_6N	Terminase large subunit, T4likevirus-type, N-terminal	large terminase subunit	NP_049776.1	99/83
gp3	2360	4333	657	71.79	4.59	Phage tail sheath	Phage_sheath_1	Phage tail sheath protein subtilisin-like domain	tail sheath protein, gp18	QPI17392.1	99/71
gp4	4461	4952	163	18.61	4.60	tail fibers protein	Phage_T4_gp19	T4-like virus tail tube protein gp19	tail tube protein, gp19	NP_049781.1	100/67
gp5	5057	6625	522	60.84	5.05	putative portal vertex protein	Portal_Gp20	Bacteriophage T4-like portal protein (Gp20)	portal protein	NP_049782.1	100/75
gp6	6625	6843	72	8.14	3.69	prohead core protein	GP67	Gene product 67	prohead core protein, gp67	NP_049783.1	68/57*
gp7	6843	7268	141	15.78	11.42	capsid and scaffold protein			prohead assembly protein, gp68	NP_049784.1	100/75
gp8	7268	7918	216	23.67	4.95	Phage prohead assembly (scaffolding) protein	Peptidase_S77	Prohead core protein serine protease	prohead core protein protease, gp21	AAA32501.1	97/80
gp9	7951	8763	270	30.19	4.15	Phage prohead assembly (scaffolding) protein			prohead core protein, gp22	NP_049786.1	99/66
gp10	8784	10343	519	55.92	5.00	major capsid protein	Gp23	Major capsid protein Gp23	major capsid protein, gp 23	NP_049787.1	99/83
gp11	10425	11705	426	46.35	4.39	capsid vertex protein	Gp23	Major capsid protein Gp23	zapsid vertex protein, gp24	NP_049789.1	100/68
gp12	12283	11735	182	20.45	7.33	hypothetical protein
gp13	13290	12283	335	37.84	6.52	RNA ligase	RNA_ligase	RNA ligase	RNA ligase 2	NP_049790.1	99/56
gp14	13557	13300	85	9.52	5.01	hypothetical protein			gp24.2 conserved hypothetical protein	NP_049791.1	63/31*
gp15	14000	13671	109	12.64	10.03	hypothetical protein
gp16	14224	13997	75	8.83	11.01	hypothetical protein	DUF2774	Protein of unknown function (DUF2774)	gp24.3 conserved hypothetical protein	NP_049792.1	72/44
gp17	15712	14303	469	48.99	4.42	capsid and scaffold protein	SP		Highly immunogenic outer capsid protein, Hoc	NP_049793.1	99/60
gp18	16516	15722	264	30.1	4.45	hypothetical protein			Inh inhibitor of prohead protease gp21	NP_049794.1	100/52
gp19	16575	18077	500	57.52	9.62	putative helicase	ResIII	Type III restriction enzyme, res subunit	RNA-DNA and DNA-DNA helicase, ATPase	QZB89791.1	99/78
gp20	18074	18316	80	9.24	3.88	DNA helicase, phage-associated	UvsW-1	UvsW.1 domain	UvsW helicase, chain A	2JPN_A	91/63
gp21	18543	18376	55	6.00	3.73	hypothetical protein	DUF2685	Protein of unknown function (DUF2685)	DUF2685 domain-containing protein	NP_049797.1	100/75
gp22	18990	18574	138	15.92	5.32	Single stranded DNA-binding protein, phage-associated	UvsY	Recombination, repair and ssDNA binding protein UvsY	recombination mediator protein UvsY	NP_049799.2	99/72
gp23	19442	19032	136	15.50	4.89	baseplate wedge subunit	GPW_gp25	Baseplate wedge protein gp25	baseplate wedge protein, gp25	NP_049800.1	94/66
gp24	20068	19439	209	23.90	5.09	Phage baseplate hub subunit (T4-like gp26)	T4_baseplate	T4 bacteriophage base plate protein	baseplate hub subunit, gp26	NP_049801.1	97/59
gp25	20120	20878	252	29.28	6.15	Phage baseplate	T4_baseplate	T4 bacteriophage base plate protein	baseplate hub assembly protein	NP_049802.1	98/56
gp26	20875	22017	380	43.45	5.73	baseplate hub subunit	Phage-tail_1	Baseplate structural protein, domain 1	baseplate hub subunit, gp27	NP_049803.1	98/62
gp27	21989	22516	175	19.76	6.27	Phage baseplate hub	Phage_hub_GP28	Baseplate hub distal subunit	baseplate distal hub subunit, gp28	NP_049804.2	100/53
gp28	22513	24246	577	64.03	4.79	hypothetical protein			baseplate hub subunit, tail length determinator, gp29	NP_049805.1	98/35
gp29	24256	25308	350	38.24	5.83	Phage baseplate tail tube cap (T4-like gp48)	T4_tail_cap	Tail-tube assembly protein	baseplate tail-tube junction protein, gp48	NP_049806.1	98/60
gp30	25308	26234	308	33.71	4.72	tail assembly protein		Similar to T4 gp54 (100%)	baseplate tail tube initiator	NP_049807.1
gp31	26534	26256	92	10.40	4.50	hypothetical protein
gp32	28724	26598	708	79.56	5.37	hypothetical protein	ADPrib_exo_Tox	ADP-ribosyltransferase exoenzyme	RNA polymerase ADP-ribosylase	NP_049811.1	93/34
gp33	28955	28776	59	6.75	4.37	hypothetical protein			Alt.1 conserved hypothetical protein	NP_049812.1	89/26
gp34	30424	28952	490	55.37	6.73	DNA ligase	DNA_ligase_A_M	ATP dependent DNA ligase domain	DNA ligase	NP_049813.1	99/57
gp35	30630	30424	68	8.1	6.77	hypothetical protein	DUF3045	Protein of unknown function (DUF3045)	DUF3045 domain-containing protein	NP_049814.1	97/44
gp36	31514	30672	280	32.08	5.08	hypothetical protein			hypothetical protein T4p204	NP_049815.1	97/48
gp37	31898	31698	66	7.45	4.83	hypothetical protein			hypothetical protein gp30,5	NP_049819.1	89/37
gp38	32065	31895	56	6.27	4.83	hypothetical protein
gp39	32354	32076	92	10.27	6.77	hypothetical protein			conserved hypothetical protein gp30.6	NP_049820.1	89/34
gp40	32849	32367	160	18.38	9.22	hypothetical protein
gp41	33248	32889	119	14.26	6.1	hypothetical protein	Phage_T4_Gp30_7	Phage Gp30.7 protein	conserved hypothetical protein gp30.7	NP_049821.1	97/49
gp42	33577	33371	68	7.74	11.56	hypothetical protein			conserved hypothetical protein gp30.9	NP_049823.1	64/93*
gp43	33576	33686	36	3.73	12.81	hypothetical protein
gp44	34165	33917	82	9.30	9.88	lysis inhibition accessory protein, rapid lysis phenotype			rIII lysis inhibition accessory protein	NP_049824.1	100/76
gp45	34604	34281	107	11.64	5.11	Phage head assembly chaperone protein (T4-like gp31)	Cpn10	Chaperonin 10 Kd subunit	co-chaperone GroES family protein	NP_049825.1	99/69
gp46	34970	34662	102	11.52	7.65	Phage tail fibers	WYL_2	WYL_2, Sm-like SH3 beta-barrel fold	SH3 beta-barrel fold-containing protein	NP_049826.1	100/63
gp47	35549	34980	189	20.68	8.04	dCMP deaminase (EC 3.5.4.12)	dCMP_cyt_deam_1	Cytidine and deoxycytidylate deaminase zinc-binding region	dCMP deaminase	NP_049828.1	98/80
gp48	35894	35550	114	12.65	4.66	hypothetical protein			Cd.1 hypothetical protei	NP_049829.1	100/29
gp49	36130	35894	78	8.61	8.33	hypothetical protein			Cd.2 conserved hypothetical protein	NP_049830.1	84/33
gp50	36404	36120	94	10.42	4.41	hypothetical protein			Cd.3 conserved hypothetical protein	NP_049831.1	95/33
gp51	37309	36416	297	34.4	8.03	3'-phosphatase, 5'-polynucleotide kinase, phage-associated	AAA_33	AAA domain	AAA family ATPase, polynucleotide kinase chain A	NP_049834.1	100/58
gp52	37521	37309	70	8.1	8.89	hypothetical protein			PseT.1 conserved hypothetical protein	NP_049835.1	90/39
gp53	37819	37532	95	11.04	6.51	Phage outer membrane lipoprotein Rz1	LipoSP		PseT.2 conserved hypothetical protein	NP_049836.2	87/56
gp54	38169	37816	117	13.07	10.29	hypothetical protein	TMD		PseT.3 conserved hypothetical membrane protein	NP_049837.1	95/38
gp55	38666	38157	169	19.31	7.18	inhibitor of host transcription	ALC	Phage ALC protein	Alc inhibitor of host transcription	NP_049838.1	98/56
gp56	39880	38729	383	44.12	4.56	RNA ligase	RNA_lig_T4_1	RNA ligase	RnlA family RNA ligase	NP_049839.1	97/50
gp57	40290	39874	138	16.03	9.54	endonuclease	GIY-YIG	GIY-YIG catalytic domain, similar to T4 DenA endonuclease II	GIY-YIG nuclease family protein, DenA endonuclease II	NP_049840.1	98/72
gp58	41460	40318	380	44.37	5.29	Ribonucleotide reductase of class Ia (aerobic), beta subunit (EC 1.17.4.1)	Ribonuc_red_sm	Ribonucleotide reductase, small chain	ribonucleotide-diphosphate reductase subunit beta	NP_049841.1	100/76
gp59	43763	41517	748	84.82	5.17	Ribonucleotide reductase of class Ia (aerobic), alpha subunit (EC 1.17.4.1)	Ribonuc_red_lgC	Ribonucleotide reductase, barrel domain	ribonucleoside-diphosphate reductase subunit alpha	NP_049845.1	100/75
gp60	44059	43754	101	11.63	8.20	Phage protein (ACLAME 596)	DUF4326	Domain of unknown function (DUF4326)	DUF4326 domain-containing protein	NP_049846.1	98/71
gp61	44262	44056	68	7.83	4.61	hypothetical protein
gp62	45119	44259	286	33.38	6.96	putative thymidylate synthase	Thymidylat_synt	Thymidylate synthase	thymidylate synthase	NP_049848.1	100/74
gp63	45429	45112	105	12.20	9.91	hypothetical protein
gp64	46012	45413	199	22.47	6.81	putative dihydrofolate reductase	DHFR_1	Dihydrofolate reductase	dihydrofolate reductase	NP_049850.1	98/46
gp65	46184	46020	54	6.51	3.79	hypothetical protein
gp66	46587	46267	106	11.76	4.82	hypothetical protein
gp67	46669	46580	29	3.11	3.61	hypothetical protein	TMD
gp68	46944	46666	92	10.80	4.56	hypothetical protein	DUF5417	Family of unknown function (DUF5417)	DUF5417 domain-containing protein	NP_049851.1	96/48
gp69	47279	47001	92	10.49	4.02	hypothetical protein	FRD2	Bacteriophage FRD2 protein	Frd.2 conserved hypothetical protein	NP_049852.1	100/35
gp70	47591	47370	73	8.44	3.56	hypothetical protein			Frd.3 hypothetical protein	NP_049853.1	84/30
gp71	47891	47634	85	9.73	3.89	hypothetical protein
gp72	48933	48016	305	33.63	4.63	putative single-stranded DNA binding protein	gp32	gp32 DNA binding protein like	single-stranded DNA-binding protein	NP_049854.1	90/67
gp73	49663	49001	220	25.95	9.82	Phage DNA helicase loader	T4_Gp59_N	T4 gene Gp59 loader of gp41 DNA helicase	59 protein	NP_049856.1	98/73
gp74	49959	49660	99	11.13	3.94	transcriptional regulator	Trans_coact	Phage late-transcription coactivator	late promoter transcription accessory protein, gp33	NP_049857.1	96/60
gp75	50212	49940	90	10.33	5.79	DsbA dsDNA binding protein	Phage_DsbA	Transcriptional regulator DsbA	double-stranded DNA binding protein	NP_049858.1	100/62
gp76	51149	50223	308	35.87	7.03	Phage ribonuclease H (EC 3.1.26.4)	RNaseH_C	T4 RNase H, C terminal	RnaseH	NP_049859.1	99/66
gp77	51225	55070	1281	138.59	8.44	long tail fiber proximal subunit			long tail fiber, proximal subunit	NP_049860.1	99/44
gp78	55070	56206	378	41.89	5.29	Phage tail fiber protein (long tail fiber) (gp35)			hinge connector of long tail fiber, proximal connector, gp35	NP_049861.1	97/31
gp79	56264	56926	220	22.82	9.56	tail fibers protein	Phage_T4_gp36	Phage T4 tail fibre	Long-tail fiber protein distal connector gp36	NP_049862.1	100/48
gp80	56936	61543	1535	162.34	6.26	tail fiber protein	Peptidase_S74	Chaperone of endosialidase	long tail fiber, distal subunit	NP_049863.1	7/33*
gp81	61581	62108	175	19.44	9.84	hypothetical protein	GP38	Phage tail fibre adhesin Gp38
gp82	62153	62809	218	24.74	8.30	putative holin	Phage_holin_T/TMD	Bacteriophage T holin	T holin	NP_049865.1	95/62
gp83	63082	62810	90	10.68	4.91	Anti-sigma factor	AsiA	Anti-Sigma Factor A	AsiA anti-sigma 70 protein	NP_049866.1	95/59
gp84	63416	63150	88	10.24	6.52	hypothetical protein
gp85	63739	63413	108	12.30	6.26	hypothetical protein
gp86	64014	63736	92	10.34	4.02	hypothetical protein
gp87	64123	63998	41	4.68	11.21	hypothetical protein
gp88	64403	64104	99	11.64	5.16	hypothetical protein			Arn.2 conserved hypothetical protein	NP_049870.1	86/39
gp89	64828	64403	141	16.07	4.96	hypothetical protein			Arn.3 conserved hypothetical protein	NP_049871.1	80/58
gp90	65166	64825	113	13.38	9.88	hypothetical protein			Arn.4 conserved hypothetical protein	NP_049872.2	46/37*
gp91	65810	65166	214	24.08	7.71	Putative transcriptional regulator MotA (ACLAME 1235)	MotA_activ	Transcription factor MotA, activation domain	Middle transcription regulatory protein MotA	NP_049873.1	100/67
gp92	66197	65934	87	10.19	4.26	hypothetical protein
gp93	67813	66425	462	52.50	7.21	DNA topoisomerase	DNA_topoisoIV	DNA gyrase/topoisomerase IV, subunit A	DNA topisomerase II medium subunit	NP_049875.1	95/67
gp94	67959	67819	46	5.08	9.56	hypothetical protein	TMD		conserved hypothetical predicted membrane protein gp52.1	NP_049876.1	100/56
gp95	68095	67952	47	4.72	4.00	hypothetical protein	SP		Ac acridine resistance protein	NP_049877.1	80/45
gp96	68247	68092	51	5.72	9.72	hypothetical protein	TMD
gp97	68720	68265	151	16.82	10.54	hypothetical protein	Phage_T4_Ndd	T4-like phage nuclear disruption protein (Ndd)	nucleoid disruption protein	NP_049879.1	97/57
gp98	69057	68866	63	7.07	10.22	hypothetical protein	TMD		Ndd.2a hypothetical periplasmic protein	NP_049882.1	61/55*
gp99	69184	69068	38	4.47	10.51	hypothetical protein	TMD
gp100	69484	69245	79	8.95	8.41	hypothetical protein
gp101	70076	69549	175	19.78	6.60	endonuclease		Similar to T4 DenB protein	DenB DNA endonuclease IV	NP_049887.1	91/58
gp102	70365	70069	98	11.29	4.86	hypothetical protein
gp103	71313	70408	301	34.01	6.79	hypothetical protein			rIIB protector from prophage-induced early lysis	NP_049889.1	97/56
gp104	73482	71314	722	82.47	5.54	hypothetical protein			rIIA protector from prophage-induced early lysis	NP_049616.1	98/34
gp105	73699	73493	68	8.30	5.72	hypothetical protein			rIIA.1 hypothetical protein	NP_049617.1	95/63
gp106	73991	73839	50	5.95	9.53	hypothetical protein
gp107	75870	74032	612	68.75	6.59	Phage DNA topoisomerase large subunit (EC 5.99.1.3)	DNA_gyraseB	DNA gyrase B	DNA topoisomerase II large subunit	NP_049621.1	78/71
gp108	76108	75911	65	6.70	4.63	hypothetical protein	TMD/SP
gp109	76439	76191	82	8.94	7.24	hypothetical protein	LipoSP		hypothetical protein gp39.1	NP_049622.1	75/68
gp110	76525	76436	29	3.30	12.30	hypothetical protein
gp111	76701	76525	58	6.73	7.17	hypothetical protein	Zn-ribbon_8	Zinc ribbon domain	hypothetical protein gp39.2	NP_049623.1	77/43
gp112	77023	76688	111	12.86	5.14	hypothetical protein
gp113	77382	77017	121	13.69	4.07	hypothetical protein
gp114	77597	77382	71	8.27	4.51	hypothetical protein			cytochrome C biogenesis protein CcmE	NP_049625.1	94/45
gp115	78102	77662	146	16.31	9.36	hypothetical protein			MotB modifier of transcription	NP_049626.1	53/31*
gp116	78333	78166	55	6.43	3.92	hypothetical protein
gp117	79022	78333	229	25.81	4.79	exonuclease	DUF5051	3' exoribonuclease, RNase T-like	3'-5' exoribonuclease	NP_049629.1	98/69
gp118	79269	79015	84	9.64	4.27	hypothetical protein			anaerobic ribonucleoside-triphosphate reductase	NP_049690.1	66/29*
gp119	80607	79276	443	50.08	8.96	DNA helicase	SH3_14	Dda helicase SH3 domain	DNA helicase	NP_049632.1	99/74
gp120	80918	80604	104	11.97	9.62	hypothetical protein			Dda.1 hypothetical protein	NP_049633.1	37/41*
gp121	81673	80918	251	28.50	10.66	putative anti-sigma factor			Srd anti-sigma factor	NP_049634.1	96/37
gp122	82419	81754	221	25.50	6.95	hypothetical protein			ModB ADP-ribosylase	NP_049636.1	78/32
gp123	82679	82491	62	7.30	3.90	hypothetical protein			hypothetical protein T4p022	NP_049637.1	100/58
gp124	83203	82679	174	19.84	6.94	hypothetical protein			ModA.3 hypothetical protein	NP_049638.1	40/30*
gp125	83372	83181	63	7.29	10.15	hypothetical protein			ModA.4 hypothetical protein	NP_049639.1	58/35*
gp126	83686	83450	78	8.51	4.42	hypothetical protein	Soc	Small outer capsid protein	Soc small outer capsid protein	NP_049644.1	88/49
gp127	83854	83717	45	5.36	12.19	hypothetical protein
gp128	84375	83854	173	19.84	5.07	dCTPase			dUTP diphosphatase	NP_049646.1	100/68
gp129	84442	84633	63	6.74	8.96	hypothetical protein	TMD
gp130	85674	84652	340	39.49	9.14	putative DNA primase	Toprim_N	DNA primase catalytic core, N-terminal domain	DNA primase subunit	NP_049648.1	100/61
gp131	85881	85714	55	5.89	10.50	hypothetical protein	Gp23	Major capsid protein Gp23	hypothetical protein gp 61.1	NP_049649.1	80/77
gp132	86112	85894	72	7.58	8.42	hypothetical protein	SP
gp133	86402	86109	97	10.63	4.14	hypothetical protein	LipoSP		sp spackle periplasmic protein	NP_049651.1	100/49
gp134	86696	86463	77	8.73	5.78	hypothetical protein
gp135	88146	86707	479	53.88	5.63	putative DNA helicase	DnaB_C	DnaB-like helicase C terminal domain	DnaB-like replicative helicase, gp41	NP_049654.1	100/78
gp136	88506	88156	116	13.52	5.62	capsid and scaffold protein	Phage_head_chap	Head assembly gene product	head vertex assembly chaperone gp40	NP_049655.1	70/47
gp137	89671	88496	391	43.48	5.12	recombination protein	RecA	recA bacterial DNA recombination protein	RecA-like recombination protein	NP_049656.2	98/82
gp138	89975	89754	73	8.58	6.07	hypothetical protein
gp139	90838	90002	278	31.83	7.12	glucosyl transferase
gp140	91569	90835	244	28.21	5.66	hypothetical protein	Thymidylat_synt	Thymidylate synthase	thymidylate synthase	NP_049659.1	99/71
gp141	91784	91578	68	7.73	11.11	hypothetical protein	Imm_superinfect/2xTMD/LipoSP	Superinfection immunity protein	superinfection immunity protein	NP_049660.1	82/49
gp142	92238	91795	147	16.39	9.77	hypothetical protein	LipoSP
gp143	95016	92308	902	194.69	5.24	putative DNA polymerase	DNA_pol_B	DNA polymerase family B	DNA polymerase	NP_049662.1	99/75
gp144	95471	95109	120	14.11	10.1	Phage endoribonulcease translational repressor of early genes, regA	Translat_reg	Bacteriophage translational regulator	translational repressor RegA	NP_049663.1	99/76
gp145	96043	95474	189	22.05	8.62	Phage DNA polymerase clamp loader subunit Gp62	Phage_clamp_A	Bacteriophage clamp loader A subunit	DNA polymerase clamp loader subunit A	NP_049664.1	99/62
gp146	97002	96040	320	35.70	7.46	Replication factor C small subunit / Phage DNA polymerase clamp loader subunit	AAA	ATPase family associated with various cellular activities (AAA)	DNA polymerase accessory protein gp44	NP_049665.1	99/72
gp147	97752	97051	233	25.68	4.46	Sliding clamp DNA polymerase accessory protein, phage associated	gp45-slide_C	gp45 sliding clamp, C terminal	sliding clamp gp45	NP_049666.1	99/74
gp148	98165	97788	125	14.24	5.02	RNA polymerase binding protein	Phage_RpbA	Phage RNA polymerase binding, RpbA	RNA polymerase-binding protein RpbA	NP_049667.1	97/57
gp149	98370	98176	64	7.66	4.27	hypothetical protein	Gp45_2	Phage gene product 45.2	protein gp45.2	NP_049668.1	96/63
gp150	100049	98367	560	64.00	8.66	Phage recombination-related endonuclease Gp46	AAA_23	AAA domain	AAA family ATPase	NP_049669.1	99/67
gp151	101068	100046	340	39.23	5.00	Phage recombination-related endonuclease Gp47	Metallophos	Calcineurin-like phosphoesterase	metallophosphoesterase	NP_049672.1	99/69
gp152	102335	101139	398	46.08	6.80	hypothetical protein	AGT	DNA alpha-glucosyltransferase	a-gt alpha glucosyl transferase	NP_049673.1	100/66
gp153	102662	102405	85	9.80	8.71	hypothetical protein			a-gt.2 hypothetical protein	NP_049675.1	50/40*
gp154	102879	102682	65	7.60	10.54	hypothetical protein			a-gt.3 hypothetical protein	NP_049676.1	98/40
gp155	103159	102857	100	11.66	9.62	hypothetical protein	DUF52564	Protein of unknown function (DUF2654)	a-gt.4 family protein	NP_049677.1	87/46
gp156	103391	103161	76	9.1	4.23	hypothetical protein	DUF5491	Family of unknown function (DUF5491)	a-gt.5 hypothetical protein	NP_049678.1	89/59
gp157	103923	103375	182	20.86	9.45	T4-like phage RNA polymerase sigma factor for late transcription			RNA polymerase sigma factor	NP_049679.1	98/77
gp158	104235	103990	81	9.51	4.01	hypothetical protein
gp159	104510	104232	92	11.01	4.00	hypothetical protein
gp160	104722	104498	74	8.60	3.91	hypothetical protein			hypothetical protein gp55.1	NP_049680.1	95/37
gp161	104997	104716	93	10.85	9.79	hypothetical protein
gp162	105265	104990	91	10.73	6.51	hypothetical protein
gp163	105594	105262	110	12.30	10.24	hypothetical protein			hypothetical protein gp55.2	NP_049681.1	98/58
gp164	105901	105659	80	9.46	6.80	hypothetical protein
gp165	106086	105898	62	7.65	5.54	hypothetical protein
gp166	106574	106272	100	11.55	4.33	Glutaredoxin			NrdH glutaredoxin	NP_049686.1	99/57
gp167	106783	106571	70	7.92	11.01	hypothetical protein	TMD		conserved hypothetical membrane protein gp55.8	NP_049687.1	97/31
gp168	106926	106792	44	5.08	4.23	hypothetical protein	TMD
gp169	107371	106901	156	18.11	8.05	Ribonucleotide reductase of class III (anaerobic), activating protein (EC 1.97.1.4)	Fer4_12	4Fe-4S single cluster domain	anaerobic ribonucleoside-triphosphate reductase activating protein	NP_049688.1	100/87
gp170	107576	107343	77	9.04	4.56	hypothetical protein
gp171	109386	107548	612	68.44	6.97	Ribonucleotide reductase of class III (anaerobic), large subunit (EC 1.17.4.2)	NRDD	Anaerobic ribonucleoside-triphosphate reductase	anaerobic ribonucleoside-triphosphate reductase	NP_049690.1	98/79
gp172	109856	109383	157	18.18	8.85	gp49 recombinase endonuclease VII	Endonuc-dimeris	T4 recombination endonuclease VII, dimerisation	recombination endonuclease VII, gp49	NP_049692.1	100/71
gp173	110201	109893	102	11.59	5.07	hypothetical protein
gp174	110646	110194	150	17.02	4.05	hypothetical protein	Inhibitor_I24	PinA peptidase inhibitor	peptidase, pin host protease inhibitor	NP_049694.1	97/31
gp175	110788	110630	52	6.14	3.68	hypothetical protein			conserved protein of unknown function gp49.1	NP_049695.1	75/56
gp176	111156	110767	129	15.13	4.26	hypothetical protein			hypothetical protein gp49.2	NP_049696.1	70/40
gp177	111328	111158	56	6.39	3.67	hypothetical protein
gp178	111621	111325	98	11.61	3.86	hypothetical protein			hypothetical protein gp49.3	NP_049697.1	87/38
gp179	111806	111618	62	71.00	9.66	hypothetical protein
gp180	112068	111799	89	10.20	7.49	thioredoxin	Glutaredoxin	Glutaredoxin	NrdC thioredoxin	NP_049698.1	95/73
gp181	112321	112031	96	11.27	9.37	hypothetical protein			NrdC.1 conserved hypothetical protein	NP_049699.1	40/48*
gp182	112484	112311	57	6.20	4.47	hypothetical protein
gp183	112989	112477	170	18.99	9.74	hypothetical protein
gp184	113318	112986	110	12.99	4.38	hypothetical protein
gp185	113629	113315	104	12.03	4.67	hypothetical protein
gp186	113886	113626	86	10.19	4.91	hypothetical protein			NrdC.2 conserved hypothetical protein	NP_049700.1	88/42
gp187	114857	113883	324	36.66	10.06	hypothetical protein
gp188	115716	114928	262	30.37	5.48	hypothetical protein
gp189	116040	115774	88	10.47	10.73	hypothetical protein	DUF4031	Protein of unknown function (DUF4031)
gp190	116201	116037	54	6.26	3.41	hypothetical protein
gp191	116482	116282	66	7.93	10.41	hypothetical protein
gp192	116869	116576	97	11.28	6.53	hypothetical protein
gp193	117227	116880	115	13.18	4.68	hypothetical protein
gp194	117649	117224	141	16.63	9.25	hypothetical protein
gp195	117792	117646	48	5.48	4.27	hypothetical protein	DUF5484	Family of unknown function (DUF5484)	conserved hypothetical protein gp55.4
gp196	118812	117835	325	36.48	5.51	thioredoxin			NrdC.10 conserved hypothetical protein	NP_049708.1	98/74
gp197	119105	118890	71	8.17	4.38	hypothetical protein
gp198	119439	119224	71	8.29	10.47	hypothetical protein	2xTMD
gp199	119597	119460	45	5.45	10.82	hypothetical protein			hypothetical protein gp61.4	NP_049652.1	37/59*
gp200	120663	119653	336	39.01	6.60	hypothetical protein	RlaP	RNA repair pathway DNA polymerase beta family	nucleotidyltransferase domain-containing protein	NP_049709.1	100/69
gp201	121082	120660	140	16.26	10.02	hypothetical protein
gp202	121288	121064	74	8.60	9.28	hypothetical protein
gp203	121778	121278	166	18.85	10.54	hypothetical protein	3xTMD
gp204	122008	121778	76	8.64	4.42	hypothetical protein
gp205	122189	121998	63	7.19	4.90	hypothetical protein
gp206	122458	122192	88	10.08	4.66	hypothetical protein	zf-dskA_traR	Prokaryotic dksA/traR C4-type zinc finger
gp207	123038	122550	162	19.01	4.32	hypothetical protein
gp208	123529	123143	128	14.53	5.13	Phage protein	DUF5856	Family of unknown function (DUF5856)	DUF5856 family protein	NP_049716.1	100/62
gp209	123803	123516	95	10.71	4.58	rI lysis inhibition regulator membrane protein	SP		rI lysis inhibition regulator, membrane protein	NP_049717.1	89/34
gp210	124027	123815	70	8.46	10.75	Phage protein			rI.1 conserved hypothetical protein	NP_049718.1	100/64
gp211	124457	124074	127	15.55	10.28	hypothetical protein
gp212	124655	124521	44	5.26	9.95	hypothetical protein
gp213	124936	124742	64	7.39	9.21	hypothetical protein	TMD/SP
gp214	125516	124917	199	22.21	5.32	thymidine kinase (EC 2.7.1.21)	TK	Thymidine kinase	thymidine kinase	NP_049719.1	94/68
gp215	125683	125516	55	6.28	4.20	Phage protein			Tk.1 conserved hypothetical protein	NP_049720.1	98/36
gp216	126175	125708	155	17.14	4.90	Phage protein	Macro	Macro domain	macro domain-containing protein	NP_049723.1	97/47
gp217	126576	126184	130	14.49	5.09	hypothetical protein	SP
gp218	126893	126573	106	11.69	8.00	Valyl-tRNA synthetase			Vs valyl-tRNA synthetase modifier	NP_049724.1	93/31
gp219	127438	126893	181	20.43	10.26	hypothetical protein	SP		transglycosylase SLT domain-containing protein	NP_049725.1	97/63
gp220	127904	127446	152	17.85	10.24	Phage endonuclease	REGB_T4	T4-page Endoribonuclease RegB	site-specific RNA endonuclease	NP_049726.1	98/57
gp221	128243	127968	91	10.47	4.72	Phage protein			Vs.4 conserved hypothetical protein	NP_049728.1	97/65
gp222	128605	128243	120	13.73	4.66	Pyruvate formate-lyase (EC 2.3.1.54)	Gly_radical	Glycine radical	autonomous glycyl radical cofactor GrcA	NP_049730.1	100/82
gp223	128958	128614	114	13.36	4.16	hypothetical protein			hypothetical protein	QPI17342.1	67/47*
gp224	129251	128940	103	11.98	10.19	Phage protein			Vs.7 conserved hypothetical protein	NP_049731.1	100/34
gp225	129781	129248	177	20.58	8.37	Phage protein			Vs.8 conserved hypothetical protein	NP_049732.1	98/37
gp226	130528	129959	189	21.36	10.31	Phage protein			IpIII internal head protein	NP_049735.1	100/87
gp227	131094	130615	159	17.83	9.62	hypothetical protein
gp228	131589	131095	164	18.03	10.20	Phage lysozyme R (EC 3.2.1.17)	Phage_lysozyme	Phage lysozyme	T4 LYSOZYME	1L88_A	99/66
gp229	131927	131619	102	12.39	8.89	hypothetical protein
gp230	132381	131935	148	17.14	6.11	Nudix hydrolase, phage-associated	NUDIX	NUDIX domain	NUDIX hydrolase	NP_049737.1	97/57
gp231	132614	132378	78	8.68	3.47	hypothetical protein
gp232	132940	132614	108	12.78	10.23	hypothetical protein	2xTMD
gp233	133233	132937	98	11.55	8.62	hypothetical protein	2xTMD
gp234	133589	133230	119	13.96	8.92	Phage protein	2xTMD		sulfurtransferase	NP_049740.1	98/28
gp235	134176	133586	196	22.43	8.1	hypothetical protein
gp236	134807	134214	197	22.23	5.51	Phage protein			e.6 conserved hypothetical protein	NP_049742.1	100/61
gp237	135145	134855	96	11.37	8.79	hypothetical protein
gp238	135917	135333	194	21.35	10.15	hypothetical protein
gp239	136358	136185	57	6.89	3.98	hypothetical protein
tRNA1	136455	136376	80	NA	NA	tRNA-Gln-CTG
tRNA2	136536	136464	73	NA	NA	tRNA-Thr-TGT
tRNA3	136623	136550	74	NA	NA	tRNA-Arg-TCT
tRNA4	136712	136629	84	NA	NA	tRNA-Leu-TAA
gp240	137301	136915	128	14.32	10.47	hypothetical protein	Phage_30_3	Bacteriophage protein GP30.3	hypothetical protein T4p205	NP_049816.1	90/42
gp241	137858	137301	185	21.80	4.59	hypothetical protein
gp242	138069	137869	66	7.80	4.14	hypothetical protein
tRNA5	138165	138092	74	NA	NA	tRNA-Met-CAT
gp243	138468	138244	74	8.13	4.68	hypothetical protein
gp244	138756	138523	77	8.62	9.96	hypothetical protein
gp245	139105	138740	121	14.36	8.63	hypothetical protein
gp246	139254	139102	50	6.07	10.74	hypothetical protein
tRNA6	139506	139433	74	NA	NA	tRNA-Pro-TGG
tRNA7	139586	139515	72	NA	NA	tRNA-Gly-TCC
tRNA8	139666	139595	72	NA	NA	tRNA-Trp-CCA
tRNA9	139748	139676	73	NA	NA	tRNA-Ile-GAT
tRNA10	139899	139818	82	NA	NA	tRNA-Ser-TGA
tRNA11	140072	140000	73	NA	NA	tRNA-His-GTG
tRNA12	140242	140171	72	NA	NA	tRNA-Gln-TTG
tRNA13	140325	140252	74	NA	NA	tRNA-Met-CAT
tRNA14	140521	140448	74	NA	NA	tRNA-Asp-GTC
tRNA15	140859	140778	82	NA	NA	tRNA-Asn-GTT
tRNA16	140941	140868	74	NA	NA	tRNA-Lys-TTT
tRNA17	141034	140951	84	NA	NA	tRNA-Tyr-GTA
gp247	141467	141117	116	12.89	7.92	hypothetical protein
gp248	141669	141484	61	7.06	4.13	hypothetical protein
gp249	141848	141669	59	6.79	10.46	hypothetical protein	TMD
gp250	142015	141857	52	5.58	8.49	hypothetical protein	TMD/SP		Trna.4 conserved hypothetical membrane protein	NP_049748.1	44/61*
gp251	142546	142091	151	17.27	6.39	hypothetical protein			hypothetical protein T4p137	NP_049750.1	100/79
gp252	142779	142546	77	8.53	3.78	hypothetical protein
gp253	143513	142776	245	28.23	6.26	deoxynucleoside monophosphate kinase			Chain A, deoxynucleoside monophosphate kinase	1DEK_A	99/58
gp254	144120	143518	200	22.27	4.70	Phage tail completion protein	Phage_T4_gp19	T4-like virus tail tube protein gp19	Tail tube terminator protein, gp3	NP_049753.1	85/51
gp255	144947	144120	275	30.96	10.84	DNA end protector protein			DNA end protector protein	NP_049754.1	99/67
gp256	145396	144947	149	17.85	10.52	head completion protein		similar to T4 gp53 (100%)	Head completion protein Gp50	NP_049755.1	100/65
gp257	145446	146084	212	24.68	4.44	baseplate wedge subunit	Phage_gp53	Base plate wedge protein 53, similat to T4 gp5-gp27 (100%)	baseplate wedge protein gp53	NP_049756.1	90/60
gp258	146081	147811	576	63.24	4.75	Phage baseplate hub structural protein / Phage lysozyme R (EC 3.2.1.17)	Gp5_OB	Gp5 N-terminal OB domain, similar to T4 gp5 (99.15%)	Tail-associated Lysozyme gp5	1K28_A	100/68
gp259	147814	148317	167	18.88	4.68	hypothetical protein			hypothetical protein T4583L_147	QZB89760.1	98/45
gp260	148318	148611	97	10.08	8.49	hypothetical protein	PAAR_motif	PAAR motif	PAAR domain-containing protein	NP_049763.1	98/80
gp261	148611	150569	652	73.56	4.68	baseplate wedge subunit		similar to T4 gp6 (100%)	baseplate wedge subunit	NP_049764.1	99/63
gp262	150566	153664	1032	119.36	5.00	Phage baseplate wedge initiator (T4-like gp7)	TMD		baseplate wedge initiator	NP_049765.1	100/62
gp263	153657	154682	341	38.66	4.64	baseplate wedge tail fiber connector	Phage-Gp8	Bacteriophage T4, Gp8 similar to T4 gp8 (100%)	baseplate structural protein gp8	1N7Z_A	96/68
gp264	154750	155661	303	32.28	5.16	hypothetical protein	T4_gp9_10	Bacteriophage T4 gp9/10-like protein Similar to T4 gp9 (100%)	baseplate wedge tail fiber connector gp9; baseplate structural protein Gp10	NP_049767.1 ; 2FL8_A	100/40; 48/29
gp265	155661	157484	607	66.64	4.43	baseplate wedge subunit and tail pin	T4_gp9_10	Bacteriophage T4 gp9/10-like protein Similar to T4 gp10 (100%)	Baseplate structural protein Gp10	2FL8_A	100/50
gp266	157486	158157	223	24.60	4.88	baseplate wedge subunit and tail pin	GP11	GP11 baseplate wedge protein	Baseplate wedge protein gp11	NP_049769.1	94/32
gp267	158157	159497	446	47.64	9.41	hypothetical protein			short tail fibers protein gp12; long tail fibers proximal subunit	NP_049770.1; NP_049860.1	75/37; 63/29
gp268	159506	161272	588	64.22	4.32	hypothetical protein	Fibritin_C	Fibritin C-terminal region	fibritin neck whiskers protein	CAA31379.1	76/35
gp269	161329	162270	313	35.06	4.48	Phage neck protein			neck protein	NP_049772.1	99/69
gp270	162274	163050	258	29.86	4.15	Phage neck protein	T4_neck-protein	Virus neck protein	neck protein	NP_049773.1	98/67
gp271	163092	163910	273	31.93	5.67	tail sheath stabilizer and completion protein	T4-gp15_tss	T4-like virus Myoviridae tail sheath stabiliser	tail connector protein gp15	4HUH_A	94/61
